# Supplementary figures and images for: Risk of Depression after 5 Alpha Reductase Inhibitor Medication: Meta-Analysis
Source: PubMed Central journal article supplement — World J Mens Health. 2019 May 23;38(4):535–44. doi: 10.5534/wjmh.190046 (PMC7502319; doi:10.5534/wjmh.190046), 2019-05-23

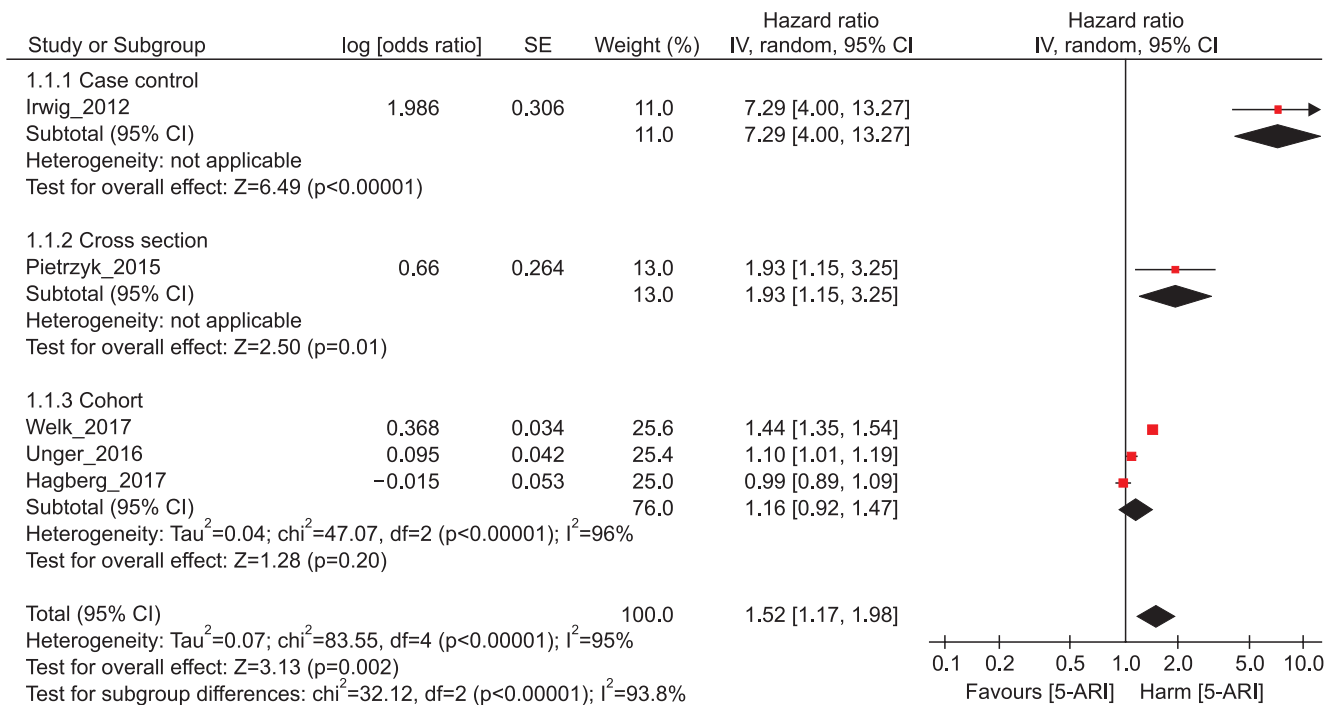

Supplement 1. Sensitivity analysis for HR.

Supplement: wjmh-38-535-s001.pdf [file wjmh-38-535-s001.pdf]

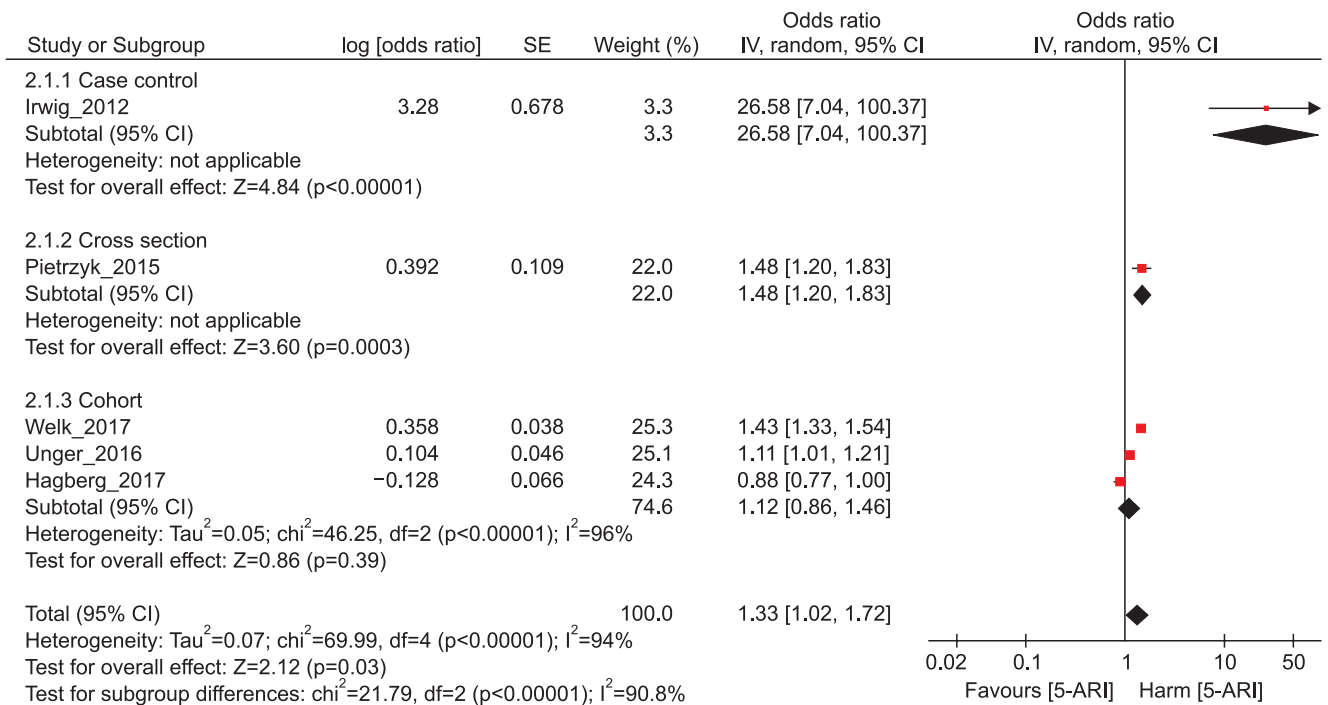

Supplement 2. Sensitivity analysis for OR.

Supplement: wjmh-38-535-s002.pdf [file wjmh-38-535-s002.pdf]

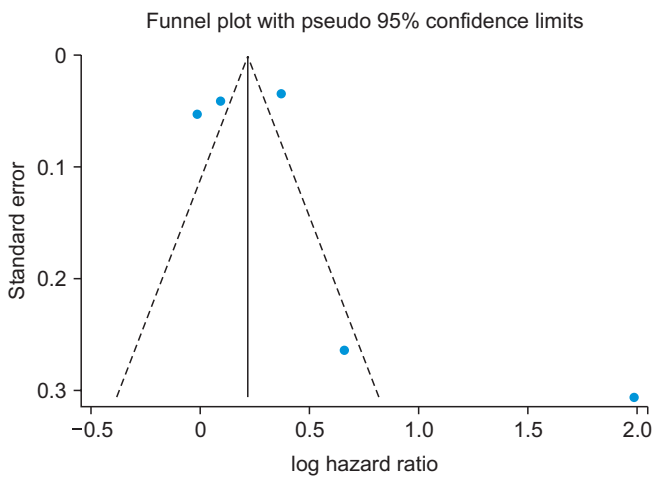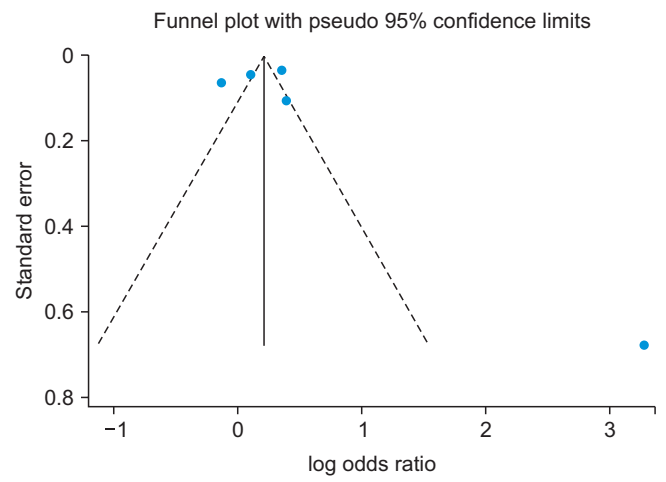

Supplement 3. Funnel plot for publication bias.

Supplement: wjmh-38-535-s003.pdf [file wjmh-38-535-s003.pdf]
